# Supplementary material for: Device deficiency and degradation diagnosis model of Perovskite solar cells through hysteresis analysis
Source: PubMed Central journal article supplement — Nat Commun. 2024 Nov 7;15:9647. doi: 10.1038/s41467-024-53162-z (PMC11543696; doi:10.1038/s41467-024-53162-z), 2024-11-07
Supplement: 41467_2024_53162_MOESM3_ESM.pdf [file 41467_2024_53162_MOESM3_ESM.pdf]

## Solar Cells Reporting Summary

Nature Portfolio wishes to improve the reproducibility of the work that we publish. This form is intended for publication with all accepted papers reporting the characterization of photovoltaic devices and provides structure for consistency and transparency in reporting. Some list items might not apply to an individual manuscript, but all fields must be completed for clarity.

For further information on Nature Research policies, including our [data availability policy](#), see [Authors & Referees](#).

### ► Experimental design

Please check the following details are reported in the manuscript, and provide a brief description or explanation where applicable.

#### 1. Dimensions

|                                          |                                                                        |                                                                                                       |                                                                   |
|------------------------------------------|------------------------------------------------------------------------|-------------------------------------------------------------------------------------------------------|-------------------------------------------------------------------|
| Area of the tested solar cells           | <input checked="" type="checkbox"/> Yes<br><input type="checkbox"/> No | 0.06 cm <sup>2</sup>                                                                                  | <i>Explain why this information is not reported/not relevant.</i> |
| Method used to determine the device area | <input type="checkbox"/> Yes<br><input checked="" type="checkbox"/> No | <i>Provide a description of the method and state where this information can be found in the text.</i> |                                                                   |
|                                          |                                                                        | Laser testing                                                                                         |                                                                   |

#### 2. Current-voltage characterization

|                                                                            |                                                                        |                                                                                                                                     |  |
|----------------------------------------------------------------------------|------------------------------------------------------------------------|-------------------------------------------------------------------------------------------------------------------------------------|--|
| Current density-voltage (J-V) plots in both forward and backward direction | <input checked="" type="checkbox"/> Yes<br><input type="checkbox"/> No | Including forward and reverse scans                                                                                                 |  |
|                                                                            |                                                                        | <i>Explain why this information is not reported/not relevant.</i>                                                                   |  |
| Voltage scan conditions                                                    | <input checked="" type="checkbox"/> Yes<br><input type="checkbox"/> No | Forward and reverse range between 0V and 1.3V                                                                                       |  |
|                                                                            |                                                                        | <i>Explain why this information is not reported/not relevant.</i>                                                                   |  |
| Test environment                                                           | <input checked="" type="checkbox"/> Yes<br><input type="checkbox"/> No | In glove box under 25 C                                                                                                             |  |
|                                                                            |                                                                        | <i>Explain why this information is not reported/not relevant.</i>                                                                   |  |
| Protocol for preconditioning of the device before its characterization     | <input type="checkbox"/> Yes<br><input checked="" type="checkbox"/> No | <i>Provide a description of the protocol.</i>                                                                                       |  |
|                                                                            |                                                                        | <i>Explain why this information is not reported/not relevant.</i>                                                                   |  |
| Stability of the J-V characteristic                                        | <input checked="" type="checkbox"/> Yes<br><input type="checkbox"/> No | PCE of the unencapsulated PSCs measured at maximum power point under continuous one-sun illumination at 45 ± 5 °C in N2 atmosphere. |  |
|                                                                            |                                                                        | <i>Explain why this information is not reported/not relevant.</i>                                                                   |  |

#### 3. Hysteresis or any other unusual behaviour

|                                                                           |                                                                        |                                                                    |  |
|---------------------------------------------------------------------------|------------------------------------------------------------------------|--------------------------------------------------------------------|--|
| Description of the unusual behaviour observed during the characterization | <input checked="" type="checkbox"/> Yes<br><input type="checkbox"/> No | We identify six kinds of hysteresis phenomena                      |  |
|                                                                           |                                                                        | <i>Explain why this information is not reported/not relevant.</i>  |  |
| Related experimental data                                                 | <input checked="" type="checkbox"/> Yes<br><input type="checkbox"/> No | We verify simulated hysteresis phenomena by experiment preparation |  |
|                                                                           |                                                                        | <i>Explain why this information is not reported/not relevant.</i>  |  |

#### 4. Efficiency

|                                                                                                                                 |                                                                        |                                                                   |  |
|---------------------------------------------------------------------------------------------------------------------------------|------------------------------------------------------------------------|-------------------------------------------------------------------|--|
| External quantum efficiency (EQE) or incident photons to current efficiency (IPCE)                                              | <input type="checkbox"/> Yes<br><input checked="" type="checkbox"/> No | <i>Provide a description of the technique used.</i>               |  |
|                                                                                                                                 |                                                                        | <i>Explain why this information is not reported/not relevant.</i> |  |
| A comparison between the integrated response under the standard reference spectrum and the response measure under the simulator | <input type="checkbox"/> Yes<br><input checked="" type="checkbox"/> No | <i>State where this information can be found in the text.</i>     |  |
|                                                                                                                                 |                                                                        | <i>Explain why this information is not reported/not relevant.</i> |  |

|                                                                                                  |                                                                        |                                                                                                                                                                                                                                                                                                                                                                                                                          |
|--------------------------------------------------------------------------------------------------|------------------------------------------------------------------------|--------------------------------------------------------------------------------------------------------------------------------------------------------------------------------------------------------------------------------------------------------------------------------------------------------------------------------------------------------------------------------------------------------------------------|
| For tandem solar cells, the bias illumination and bias voltage used for each subcell             | <input type="checkbox"/> Yes<br><input checked="" type="checkbox"/> No | <div style="border: 1px solid #ccc; padding: 2px; margin-bottom: 2px;"><i>Provide a description of the measurement conditions.</i></div> <div style="border: 1px solid #ccc; padding: 2px;"><i>Explain why this information is not reported/not relevant.</i></div>                                                                                                                                                      |
| <br>                                                                                             |                                                                        |                                                                                                                                                                                                                                                                                                                                                                                                                          |
| <b>5. Calibration</b>                                                                            |                                                                        |                                                                                                                                                                                                                                                                                                                                                                                                                          |
| Light source and reference cell or sensor used for the characterization                          | <input checked="" type="checkbox"/> Yes<br><input type="checkbox"/> No | <div style="border: 1px solid #ccc; padding: 2px; margin-bottom: 2px;">Simulated AM 1.5 sunlight was generated by an Abet Class AAB AM 1.5G solar simulator. The light intensity (100 mW cm<sup>-2</sup>) was calibrated by an ISO 17025-certified KG3-filtered silicon reference cell.</div> <div style="border: 1px solid #ccc; padding: 2px;"><i>Explain why this information is not reported/not relevant.</i></div> |
| Confirmation that the reference cell was calibrated and certified                                | <input checked="" type="checkbox"/> Yes<br><input type="checkbox"/> No | <div style="border: 1px solid #ccc; padding: 2px; margin-bottom: 2px;">KG3-filtered silicon reference cell</div> <div style="border: 1px solid #ccc; padding: 2px;"><i>Explain why this information is not reported/not relevant.</i></div>                                                                                                                                                                              |
| Calculation of spectral mismatch between the reference cell and the devices under test           | <input checked="" type="checkbox"/> Yes<br><input type="checkbox"/> No | <div style="border: 1px solid #ccc; padding: 2px; margin-bottom: 2px;"><i>Provide a value of the spectral mismatch and/or a description of how it has been taken into account in the measurements.</i></div> <div style="border: 1px solid #ccc; padding: 2px;"><i>Explain why this information is not reported/not relevant.</i></div>                                                                                  |
| <br>                                                                                             |                                                                        |                                                                                                                                                                                                                                                                                                                                                                                                                          |
| <b>6. Mask/aperture</b>                                                                          |                                                                        |                                                                                                                                                                                                                                                                                                                                                                                                                          |
| Size of the mask/aperture used during testing                                                    | <input checked="" type="checkbox"/> Yes<br><input type="checkbox"/> No | <div style="border: 1px solid #ccc; padding: 2px; margin-bottom: 2px;">a device area of 0.06 cm<sup>2</sup></div> <div style="border: 1px solid #ccc; padding: 2px;"><i>Explain why this information is not reported/not relevant.</i></div>                                                                                                                                                                             |
| Variation of the measured short-circuit current density with the mask/aperture area              | <input type="checkbox"/> Yes<br><input checked="" type="checkbox"/> No | <div style="border: 1px solid #ccc; padding: 2px; margin-bottom: 2px;"><i>Report the difference in the short-circuit current density values measured with the mask and aperture area.</i></div> <div style="border: 1px solid #ccc; padding: 2px;"><i>Explain why this information is not reported/not relevant.</i></div>                                                                                               |
| <br>                                                                                             |                                                                        |                                                                                                                                                                                                                                                                                                                                                                                                                          |
| <b>7. Performance certification</b>                                                              |                                                                        |                                                                                                                                                                                                                                                                                                                                                                                                                          |
| Identity of the independent certification laboratory that confirmed the photovoltaic performance | <input type="checkbox"/> Yes<br><input checked="" type="checkbox"/> No | <div style="border: 1px solid #ccc; padding: 2px; margin-bottom: 2px;"><i>Identify the independent certification laboratory.</i></div> <div style="border: 1px solid #ccc; padding: 2px;"><i>Explain why this information is not reported/not relevant.</i></div>                                                                                                                                                        |
| A copy of any certificate(s)                                                                     | <input type="checkbox"/> Yes<br><input checked="" type="checkbox"/> No | <div style="border: 1px solid #ccc; padding: 2px; margin-bottom: 2px;"><i>Certificate copies should be provided in the Supplementary information. Please state the supplementary item number.</i></div> <div style="border: 1px solid #ccc; padding: 2px;"><i>Explain why this information is not reported/not relevant.</i></div>                                                                                       |
| <br>                                                                                             |                                                                        |                                                                                                                                                                                                                                                                                                                                                                                                                          |
| <b>8. Statistics</b>                                                                             |                                                                        |                                                                                                                                                                                                                                                                                                                                                                                                                          |
| Number of solar cells tested                                                                     | <input type="checkbox"/> Yes<br><input checked="" type="checkbox"/> No | <div style="border: 1px solid #ccc; padding: 2px; margin-bottom: 2px;"><i>Report how many solar cells have been tested, specifying the number of individual substrates.</i></div> <div style="border: 1px solid #ccc; padding: 2px;"><i>Explain why this information is not reported/not relevant.</i></div>                                                                                                             |
| Statistical analysis of the device performance                                                   | <input type="checkbox"/> Yes<br><input checked="" type="checkbox"/> No | <div style="border: 1px solid #ccc; padding: 2px; margin-bottom: 2px;"><i>State where this information can be found in the text.</i></div> <div style="border: 1px solid #ccc; padding: 2px;"><i>Explain why this information is not reported/not relevant.</i></div>                                                                                                                                                    |
| <br>                                                                                             |                                                                        |                                                                                                                                                                                                                                                                                                                                                                                                                          |
| <b>9. Long-term stability analysis</b>                                                           |                                                                        |                                                                                                                                                                                                                                                                                                                                                                                                                          |
| Type of analysis, bias conditions and environmental conditions                                   | <input checked="" type="checkbox"/> Yes<br><input type="checkbox"/> No | <div style="border: 1px solid #ccc; padding: 2px; margin-bottom: 2px;">PCE of the unencapsulated PSCs measured at maximum power point under continuous one-sun illumination at 45 ± 5 °C in N<sub>2</sub> atmosphere.</div> <div style="border: 1px solid #ccc; padding: 2px;"><i>Explain why this information is not reported/not relevant.</i></div>                                                                   |
